# Supplementary figures and images for: Deficient spermiogenesis in mice lacking Rlim
Source: eLife journal article supplement (doi:10.7554/elife.63556), 2021-02-23

**A**

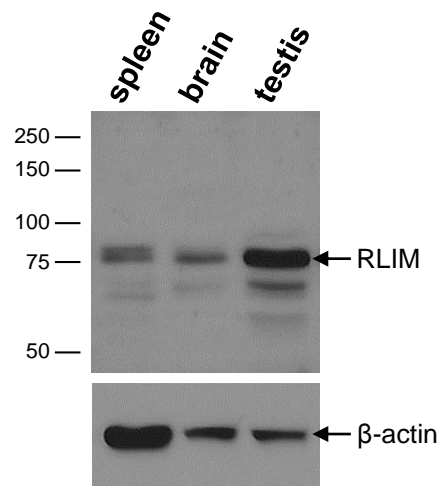

**B**

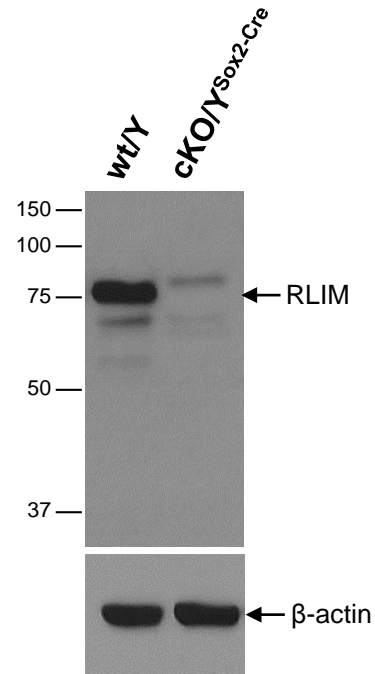

**C**

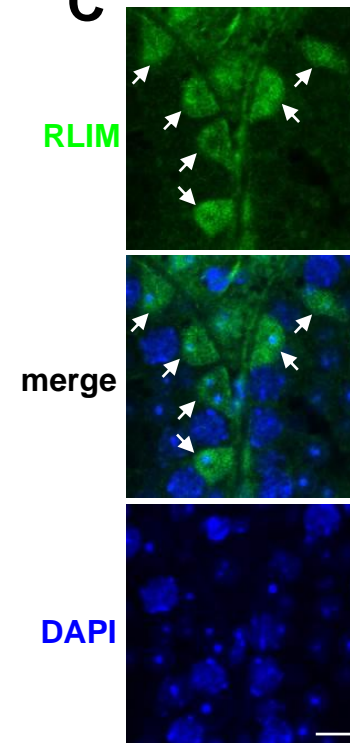

Supplement: supp [file elife_poa_e63556_Figure_2_figure_supplement_1.pdf › elife_poa_e63556_Figure_2_figure_supplement_1.pdf]

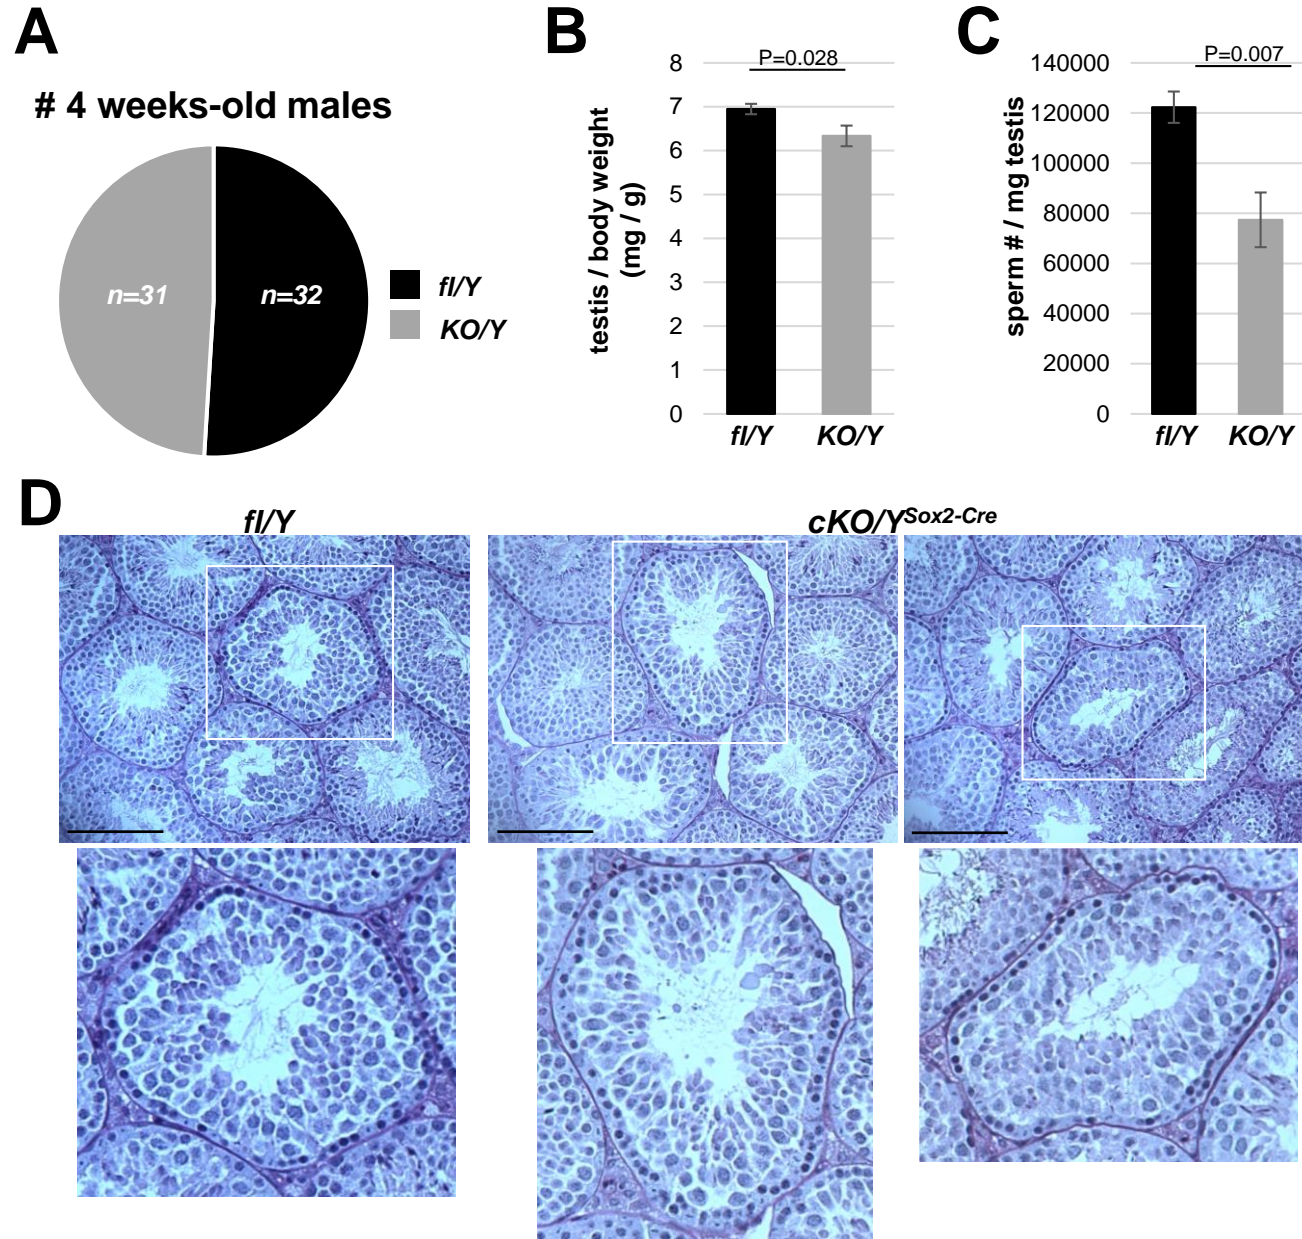

Supplement: supp [file elife_poa_e63556_Figure_3_figure_supplement_1.pdf › elife_poa_e63556_Figure_3_figure_supplement_1.pdf]

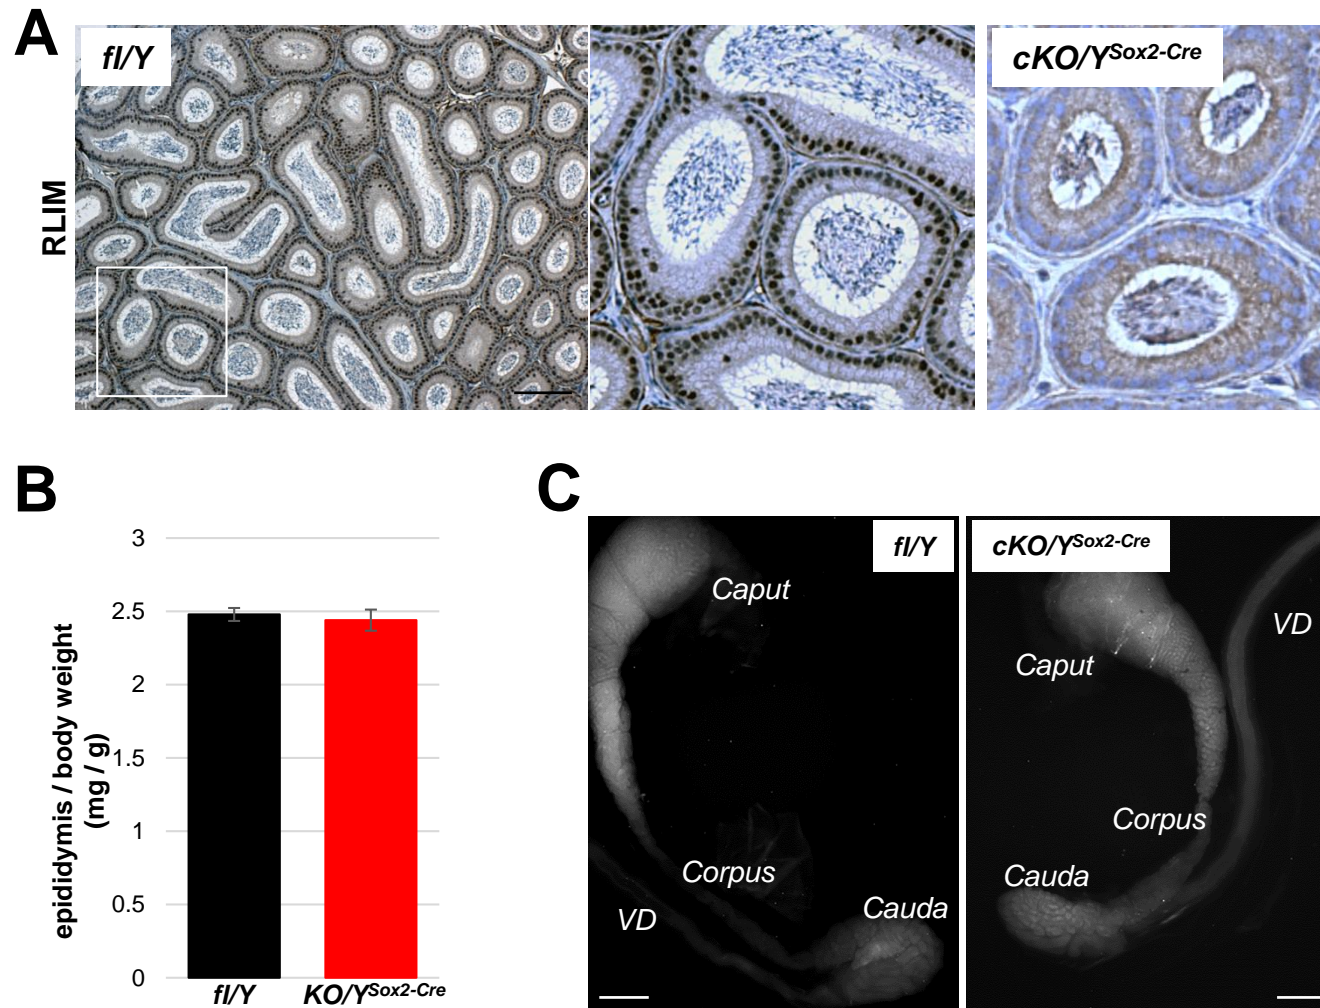

Supplement: supp [file elife_poa_e63556_Figure_3_figure_supplement_2.pdf › elife_poa_e63556_Figure_3_figure_supplement_2.pdf]

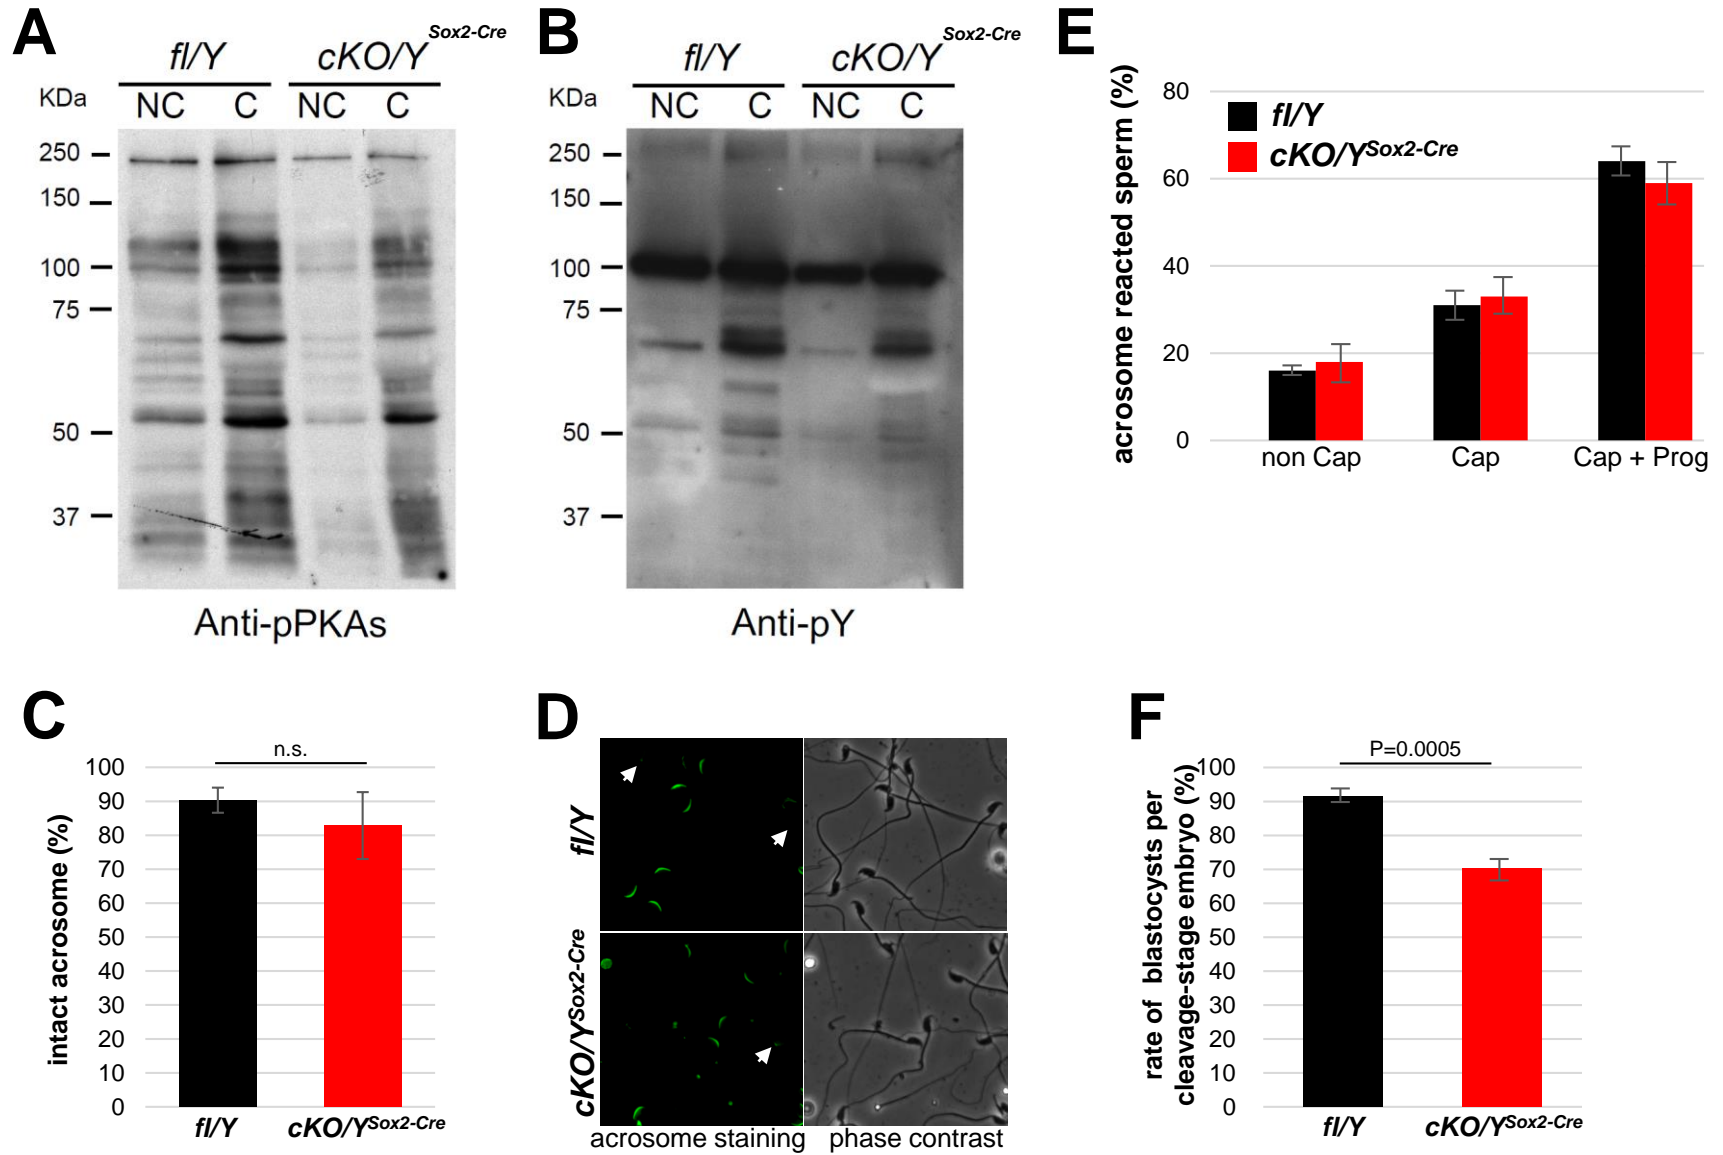

Supplement: supp [file elife_poa_e63556_Figure_4_figure_supplement_1.pdf › elife_poa_e63556_Figure_4_figure_supplement_1.pdf]

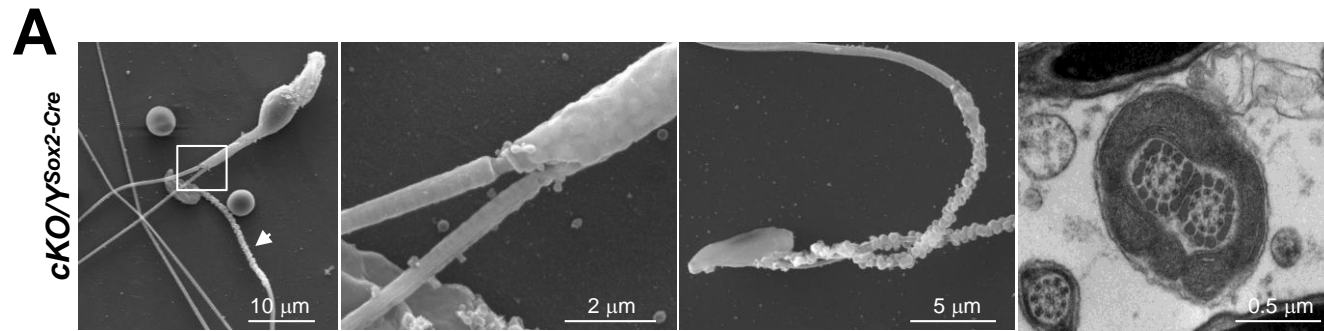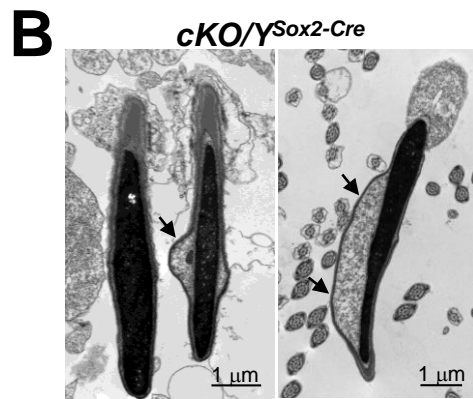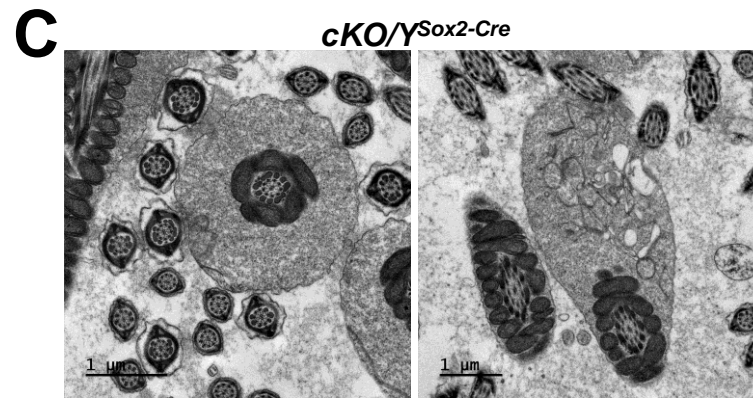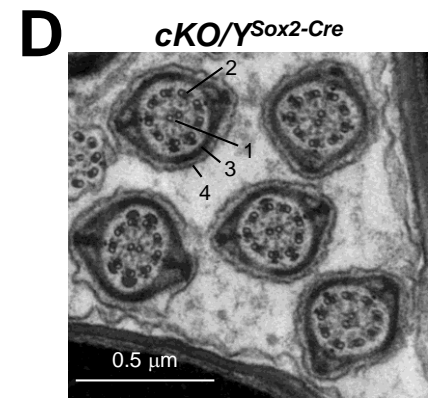

Supplement: supp [file elife_poa_e63556_Figure_6_figure_supplement1.pdf › elife_poa_e63556_Figure_6_figure_supplement1.pdf]

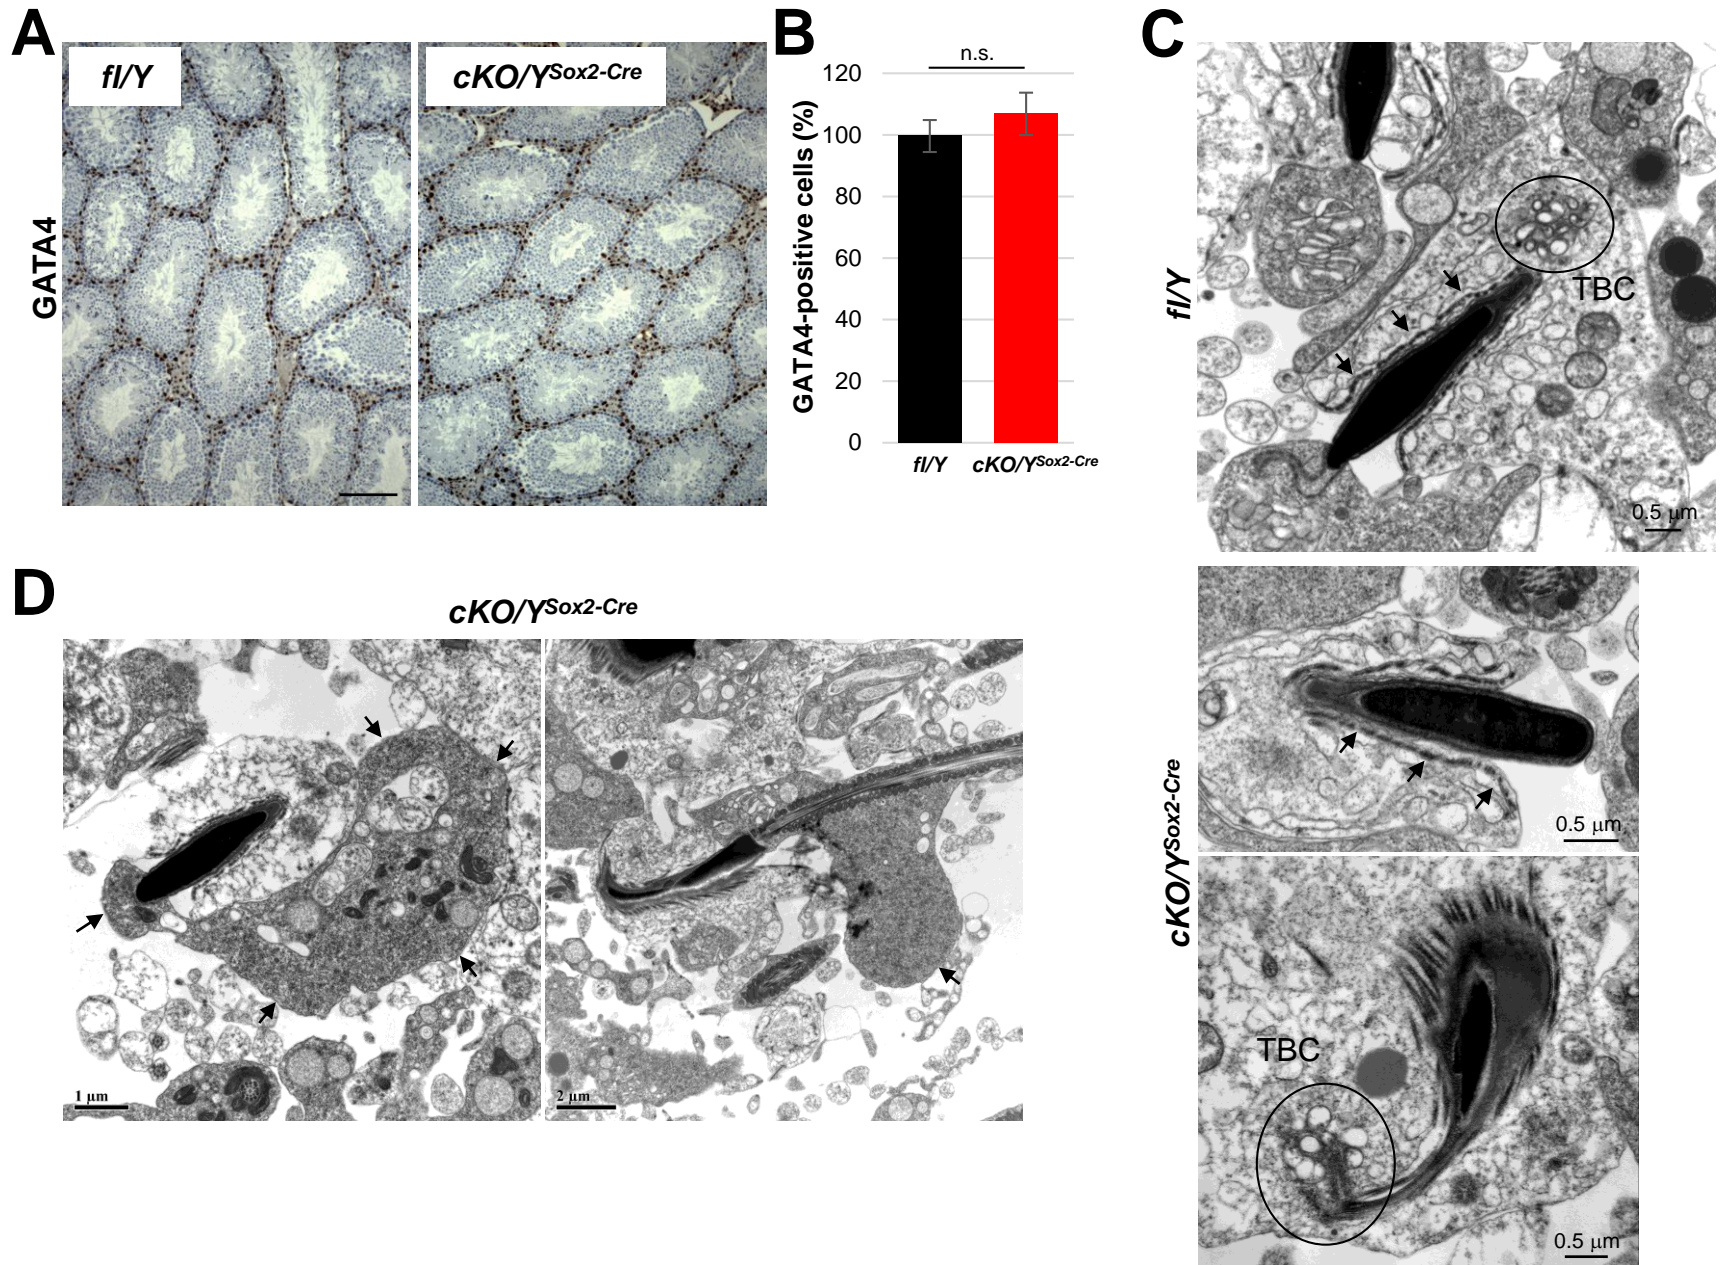

Supplement: supp [file elife_poa_e63556_Figure_7_figure_supplement_1.pdf › elife_poa_e63556_Figure_7_figure_supplement_1.pdf]
